# Supplementary material
Source: MDPI journal article supplement (https://www.mdpi.com/1996-1944/7/2/673)
Supplement: s1 [file s1]

(listing pending)
